# Supplementary material for: Close relationship partners of impartial altruists do not report diminished relationship quality and are similarly altruistic
Source: Springer Nature journal article supplement (doi:10.1038/s44271-024-00181-7), 2024-12-27
Supplement: MOESM2 [file 44271_2024_181_MOESM2_ESM.pdf › 44271_2024_181_MOESM2_ESM.pdf]

## **Supporting Information for**

Close relationship partners of impartial altruists do not report diminished relationship quality and are similarly altruistic

Paige Amormino, Adam C. Kagel, Joanna Li, & Abigail A. Marsh

Paige Amormino  
Email: pa546@georgetown.edu

### **This PDF file includes:**

Supporting text  
Figure S1  
Tables S1 to S7

Supporting Information Text

To assess whether groups ranked people similarly across different social distances, participants described their relationship with each N via a multiple-choice prompt, which included 14 relationship categories (see Figure S1). Chi-square tests of independence (2x14, where group = altruistic/control dyad) were performed at each social distance to detect any differences between groups and the participants' relationship with each N. Groups did not differ in the proportion of relationship types with N's across social distances (see Figure S1): At Social Distance #1,  $\chi^2$  (30, N = 260) = 10.25,  $p = >.999$ ; Social Distance #2,  $\chi^2$  (33, N = 260) = 13.33,  $p = >.999$ ; Social Distance #5,  $\chi^2$  (42, N = 260) = 19.00,  $p = >.999$ ; Social Distance #10,  $\chi^2$  (39, N = 260) = 12.27,  $p = >.999$ ; Social Distance #20,  $\chi^2$  (33, N =260) = 13.32,  $p = >.999$ ; Social Distance #50,  $\chi^2$  (33, N = 260) = 10.43,  $p = >.999$ .

SI Figures

**Figure S1**  
*Nominated Relationship Type of Participants from the Social Discounting Task*

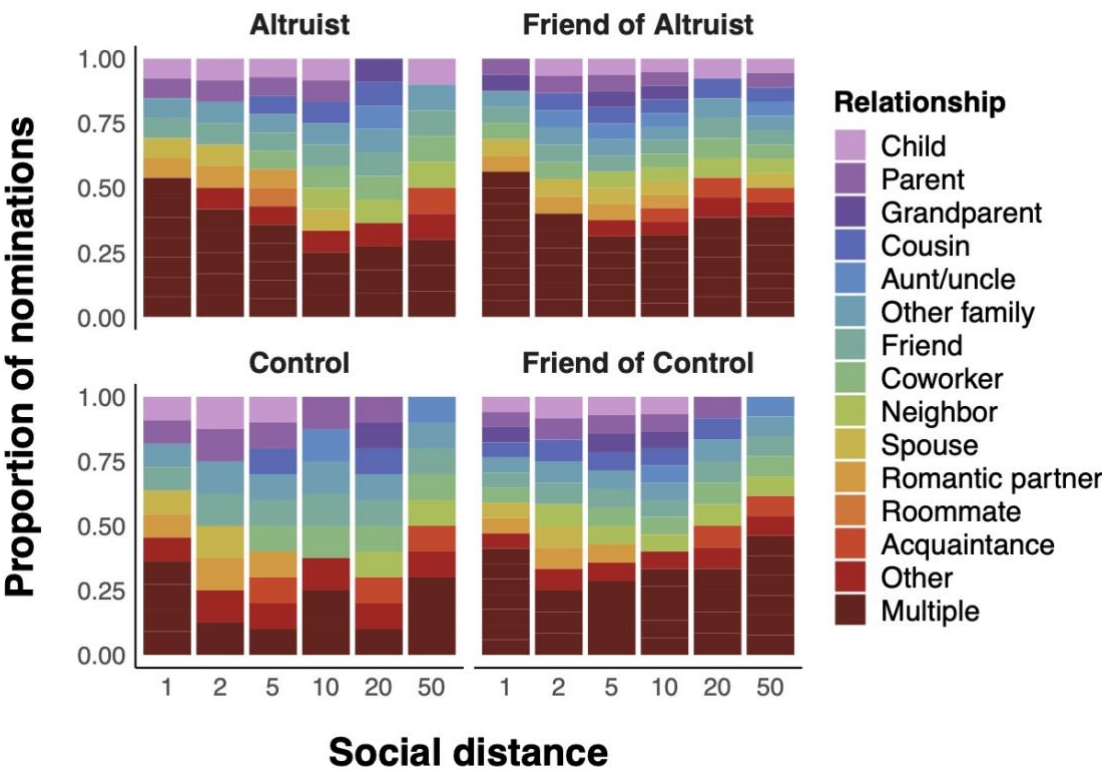

SI Tables

**Table S1***Hyperbolic Model Predicting Classic Social Discounting Rates in Altruists and Controls*

|                                         | b [95% CI]                 | t value | p-value  |
|-----------------------------------------|----------------------------|---------|----------|
| Intercept                               | 75.45<br>[73.54,<br>77.36] | 77.29   | <.001*** |
| log <i>k</i> , mean<br>discounting rate | -3.84 [-6.19,<br>-1.49]    | -3.21   | .001**   |
| Altruist > Control                      | -1.98 [-3.06,<br>-0.90]    | -3.58   | <.001*** |
| <i>Demographic Covariates</i>           |                            |         |          |
| Age                                     | -0.005 [-<br>0.03, 0.02]   | 0.49    | .718     |
| Gender                                  | 0.2 [-0.73,<br>1.21]       | -0.36   | .628     |
| Household Income                        | 0.03 [-0.26,<br>0.32]      | 0.21    | .831     |

*Note.* 95% CI = 95% Confidence Interval. Degrees of Freedom = 703. Groups are indicator variables relative to the reference group (controls). \*  $p \leq 0.05$ , \*\*  $p \leq 0.01$ , \*\*\*  $p \leq 0.001$ . Beta values are unstandardized.

**Table S2***Linear Regression Predicting MFQ-RA from Group Membership*

|                               | b [95% CI]          | t value | p-value  |
|-------------------------------|---------------------|---------|----------|
| Intercept                     | 3.95 [3.06,4.83]    | 8.76    | <.001*** |
| Group <sup>a</sup>            | -0.29 [-0.65, 0.07] | -1.57   | .121     |
| <i>Demographic Covariates</i> |                     |         |          |
| Age <sup>b</sup>              | 0.004 [-0.01,0.02]  | 0.48    | .633     |
| Gender <sup>b</sup>           | -0.10 [-0.44,0.23]  | -0.60   | .549     |
| Household Income <sup>b</sup> | 0.04 [-0.10,0.19]   | 0.51    | .608     |
| Age <sup>c</sup>              | -0.01 [-0.03,0.01]  | -1.34   | .183     |
| Gender <sup>c</sup>           | -0.03 [-0.37,0.32]  | -0.15   | .878     |
| Household Income <sup>c</sup> | -0.03 [-0.18,0.12]  | -0.37   | .715     |

*Note.* 95% CI = 95% Confidence Interval. Degrees of Freedom = 104. Beta values are unstandardized.

<sup>a</sup>Close others of Altruist

<sup>b</sup>Close others' data

<sup>c</sup>Altruists' and Controls' data

\*  $p \leq 0.05$ , \*\*  $p \leq 0.01$ , \*\*\*  $p \leq 0.001$

**Table S3**

*Linear Regression Predicting MFQ-FF from Group Membership*

|                               | <i>b</i> [95% CI] | t value | p-value  |
|-------------------------------|-------------------|---------|----------|
| Intercept                     | 7.59[6.41,8.76]   | 12.68   | <.001*** |
| Group <sup>a</sup>            | -0.23[-0.71,0.25] | -0.94   | .352     |
| <i>Demographic Covariates</i> |                   |         |          |
| Age <sup>b</sup>              | 0.001[-0.02,0.02] | 0.09    | .928     |
| Gender <sup>b</sup>           | 0.07[-0.38,0.51]  | 0.29    | .775     |
| Household Income <sup>b</sup> | 0.03[-0.16,0.22]  | 0.33    | .741     |
| Age <sup>c</sup>              | -0.01[-0.04,0.01] | -1.14   | .258     |
| Gender <sup>c</sup>           | 0.23[-0.23,0.69]  | 0.10    | .321     |
| Household Income <sup>c</sup> | -0.06[-0.25,0.14] | -0.58   | .562     |

*Note.* 95% CI = 95% Confidence Interval. Degrees of Freedom = 104. Beta values are unstandardized.

<sup>a</sup>Close-others of Altruist

<sup>b</sup>Close-others' data

<sup>c</sup>Altruists' and Controls' data

\*  $p \leq 0.05$ , \*\*  $p \leq 0.01$ , \*\*\*  $p \leq 0.001$

**Table S4**  
*Bivariate Spearman Correlations*

| Variable                            | 1       | 2       | 3       | 4       | 5       | 6       | 7       | 8       | 9       | 10     | 11      | 12    | 13 | 14 | 15 | 16 | 17 | 18 |
|-------------------------------------|---------|---------|---------|---------|---------|---------|---------|---------|---------|--------|---------|-------|----|----|----|----|----|----|
| 1. MFQ-FF Help                      |         |         |         |         |         |         |         |         |         |        |         |       |    |    |    |    |    |    |
| 2. MFQ-FF Emotional Security        | 0.74*** |         |         |         |         |         |         |         |         |        |         |       |    |    |    |    |    |    |
| 3. MFQ-FF Intimacy                  | 0.66*** | 0.77*** |         |         |         |         |         |         |         |        |         |       |    |    |    |    |    |    |
| 4. MFQ-FF Stimulating Companionship | 0.74*** | 0.74*** | 0.66*** |         |         |         |         |         |         |        |         |       |    |    |    |    |    |    |
| 5. MFQ-FF Reliable Alliance         | 0.34*** | 0.44*** | 0.46*** | 0.33*** |         |         |         |         |         |        |         |       |    |    |    |    |    |    |
| 6. MFQ-FF Self-Validation           | 0.74*** | 0.82*** | 0.65*** | 0.75*** | 0.40*** |         |         |         |         |        |         |       |    |    |    |    |    |    |
| 7. MFQ-FF Total                     | 0.89*** | 0.91*** | 0.82*** | 0.87*** | 0.48*** | 0.89*** |         |         |         |        |         |       |    |    |    |    |    |    |
| 8. MFQ-RA Satisfaction              | 0.46*** | 0.61*** | 0.58*** | 0.48*** | 0.50*** | 0.51*** | 0.60*** |         |         |        |         |       |    |    |    |    |    |    |
| 9. MFQ-RA Positive Feelings         | 0.47*** | 0.55*** | 0.53*** | 0.47*** | 0.48*** | 0.49*** | 0.56*** | 0.73*** |         |        |         |       |    |    |    |    |    |    |
| 10. MFQ-RA Total                    | 0.50*** | 0.63*** | 0.58*** | 0.51*** | 0.51*** | 0.53*** | 0.62*** | 0.95*** | 0.85*** |        |         |       |    |    |    |    |    |    |
| 11. MRS                             | -0.04   | -0.03   | 0.01    | -0.06   | -0.08   | -0.04   | -0.05   | 0.03    | -0.09   | -0.01  |         |       |    |    |    |    |    |    |
| 12. MTS                             | 0.04    | 0.04    | 0.05    | -0.08   | 0.18**  | 0.08    | 0.07    | 0.16**  | 0.13*   | 0.17** | 0.25*** |       |    |    |    |    |    |    |
| 13. OUS IH                          | 0.10    | 0.10+   | 0.04    | 0.04    | -0.02   | 0.11+   | 0.09    | -0.03   | -0.01   | -0.03  | -0.05   | -0.02 |    |    |    |    |    |    |

|                         |                    |                    |                    |          |          |         |         |                    |                    |        |         |                    |                    |                    |                    |        |         |         |
|-------------------------|--------------------|--------------------|--------------------|----------|----------|---------|---------|--------------------|--------------------|--------|---------|--------------------|--------------------|--------------------|--------------------|--------|---------|---------|
| 14. OUS IB              | -0.12*             | -0.12 <sup>+</sup> | -0.15**            | -0.17**  | -0.25*** | -0.13*  | -0.16** | -0.14*             | -0.10 <sup>+</sup> | -0.14* | 0.12*   | -0.26***           | 0.20***            |                    |                    |        |         |         |
| 15. OUS Total           | 0.01               | -0.01              | -0.09              | -0.09    | -0.14*   | -0.01   | -0.04   | -0.09 <sup>+</sup> | -0.02              | -0.07  | 0.04    | -0.12 <sup>+</sup> | 0.75***            | 0.72***            |                    |        |         |         |
| 16. Age                 | -0.20**            | -0.14*             | -0.12 <sup>+</sup> | -0.25*** | 0.22***  | -0.18** | -0.19** | 0.01               | -0.03              | -0.02  | -0.16** | -0.16**            | -0.13 <sup>+</sup> | -0.09 <sup>+</sup> | -0.12 <sup>+</sup> |        |         |         |
| 17. Gender <sup>a</sup> | -0.04              | 0.05               | 0.01               | -0.01    | 0.01     | 0.08    | 0.02    | -0.01              | -0.03              | 0.004  | 0.03    | -0.01              | 0.01               | -0.18**            | -0.09              | -0.05  |         |         |
| 18. Education           | 0.09               | -0.02              | 0.06               | -0.001   | -0.03    | 0.02    | 0.05    | 0.01               | 0.09 <sup>+</sup>  | 0.06   | 0.04    | -0.10 <sup>+</sup> | -0.03              | 0.01               | 0.003              | -0.04  | -0.06   |         |
| 19. Income              | -0.10 <sup>+</sup> | -0.14*             | -0.12 <sup>+</sup> | -0.20*** | -0.01    | -0.12*  | -0.15*  | -0.09 <sup>+</sup> | -0.004             | -0.07  | -0.14*  | -0.12*             | 0.001              | 0.11 <sup>+</sup>  | 0.09               | 0.16** | -0.18** | 0.29*** |

*Note.* MFQ-FF/-RA = McGill Friendship Questionnaire, Close-other's Functions/Respondent's Affection. MRS = Moral Relativism Scale. MTS = Moral Tolerance Scale. OUS IH/IB = Oxford Utilitarianism Scale, Instrumental Harm/Impartial Beneficence.

<sup>a</sup> 0 = woman; 1 = man. Degrees of freedom = 222.

<sup>+</sup> $p \leq .1$ , \* $p \leq 0.05$ , \*\* $p \leq 0.01$ , \*\*\* $p \leq 0.001$

**Table S5***Linear Regression Predicting MFQ-RA from Third Party Discounting for N=1 (AUC)*

|                               | <i>b</i> [95% CI]  | t value | p-value |
|-------------------------------|--------------------|---------|---------|
| Intercept                     | 4.14[3.25,5.02]    | 9.15    | <.001   |
| AUC for N=1                   | -0.02[-0.54,0.5]   | -0.09   | .928    |
| <i>Demographic Covariates</i> |                    |         |         |
| Age <sup>a</sup>              | 0.001[-0.02,0.02]  | 0.15    | .880    |
| Gender <sup>a</sup>           | -0.10[-0.45,0.25]  | -0.58   | .565    |
| Household Income <sup>a</sup> | 0.03[-0.11,0.18]   | 0.45    | .654    |
| Age <sup>b</sup>              | -0.01[-0.12,-0.09] | -1.12   | .264    |
| Gender <sup>b</sup>           | -0.05[-0.41,0.31]  | -0.27   | .790    |
| Household Income <sup>b</sup> | -0.06[-0.21,0.09]  | -0.80   | .426    |

*Note.* 95% CI = 95% Confidence Interval. Degrees of Freedom = 102. Beta values are unstandardized.

<sup>a</sup>Close-others' data

<sup>b</sup>Altruists' and Controls' data

\*  $p \leq 0.05$ , \*\*  $p \leq 0.01$ , \*\*\*  $p \leq 0.001$

**Table S6***Linear Regression Predicting MFQ-FF from Third Party Discounting for N=1 (AUC)*

|                               | <i>b</i> [95% CI]  | t value | p-value  |
|-------------------------------|--------------------|---------|----------|
| Intercept                     | 7.77[6.61, 8.94]   | 13.05   | <.001*** |
| AUC for N=1                   | -0.03[-0.71, 0.66] | -0.08   | .933     |
| <i>Demographic Covariates</i> |                    |         |          |
| Age <sup>a</sup>              | -0.001[-0.02,0.02] | -0.12   | .903     |
| Gender <sup>a</sup>           | 0.06[-0.40,0.51]   | 0.24    | .810     |
| Household Income <sup>a</sup> | 0.03[-0.16,0.22]   | 0.32    | .750     |
| Age <sup>b</sup>              | -0.01[-0.04,0.01]  | -1.03   | .306     |
| Gender <sup>b</sup>           | 0.20[-0.27,0.67]   | 0.83    | .408     |
| Household Income <sup>b</sup> | -0.09[-0.10,0.29]  | -0.86   | .390     |

*Note.* 95% CI = 95% Confidence Interval. Degrees of Freedom = 102. Beta values are unstandardized.

<sup>a</sup>Close-others' data

<sup>b</sup>Altruists' and Controls' data

\*  $p \leq 0.05$ , \*\*  $p \leq 0.01$ , \*\*\*  $p \leq 0.001$

**Table S7**  
*Descriptive Statistics*

|                                        | Altruists   |           |                    | Controls    |            |                    | Altruists' Close-others |            |                    | Controls' Close-others |            |                    |
|----------------------------------------|-------------|-----------|--------------------|-------------|------------|--------------------|-------------------------|------------|--------------------|------------------------|------------|--------------------|
|                                        | M (SD)      | Min-Max   | Skew<br>(Kurtosis) | M (SD)      | Min-Max    | Skew<br>(Kurtosis) | M (SD)                  | Min-Max    | Skew<br>(Kurtosis) | M (SD)                 | Min-Max    | Skew<br>(Kurtosis) |
| MFQ-FF Help                            | 6.65 (1.15) | 3.80-8.00 | -0.68<br>(2.45)    | 6.75 (1.24) | 3.40-8.00  | -1.01<br>(3.04)    | 6.47 (1.44)             | 2.84-2.80  | -0.90<br>(2.84)    | 6.97 (1.44)            | 0.40-8.00  | -2.50<br>(12.40)   |
| MFQ-FF<br>Emotional<br>Security        | 6.89 (1.19) | 2.80-8.00 | -1.51<br>(5.14)    | 6.89 (1.45) | 0.80-8.00  | -2.21<br>(8.36)    | 6.48 (1.67)             | 2.40-8.00  | -1.13<br>(3.16)    | 7.08 (1.26)            | 2.40-8.00  | -1.97<br>(6.87)    |
| MFQ-FF<br>Intimacy                     | 6.96 (1.10) | 3.20-8.00 | -1.32<br>(4.74)    | 7.08 (1.06) | 3.60-8.00  | -1.69<br>(5.48)    | 6.64 (1.45)             | 2.40-8.00  | -1.09<br>(3.17)    | 7.05 (1.30)            | 2.20-8.00  | -1.92<br>(6.35)    |
| MFQ-FF<br>Stimulating<br>Companionship | 6.51 (1.24) | 3.00-8.00 | -0.64<br>(2.68)    | 6.92 (1.09) | 2.60-8.00  | -1.69<br>(6.43)    | 6.52 (1.45)             | 2.20-8.00  | -0.93<br>(3.05)    | 6.88 (1.33)            | 3.00-8.00  | -1.29<br>(3.79)    |
| MFQ-FF<br>Reliable<br>Alliance         | 7.68 (0.54) | 5.80-8.00 | -1.82<br>(5.71)    | 7.57 (0.62) | 5.00-8.00  | -1.87<br>(6.89)    | 7.65 (0.72)             | 4.60-8.00  | -2.61<br>(9.51)    | 7.49 (0.85)            | 4.00-8.00  | -2.38<br>(8.45)    |
| MFQ-FF Self-<br>Validation             | 6.76 (1.28) | 3.60-8.00 | -1.68<br>(5.32)    | 6.79 (1.44) | 2.20-8.00  | -1.58<br>(5.32)    | 6.55 (1.57)             | 0.60-8.00  | -1.49<br>(5.21)    | 6.93 (1.31)            | 2.80-8.00  | -1.37<br>(4.18)    |
| MFQ-FF Total                           | 6.77 (0.88) | 4.27-7.87 | -0.70<br>(2.90)    | 6.87 (0.96) | 3.63-7.87  | -1.48<br>(4.72)    | 6.58 (1.22)             | 3.47-7.87  | -1.03<br>(3.04)    | 6.93 (1.03)            | 3.50-7.87  | -1.61<br>(5.26)    |
| MFQ-RA<br>Satisfaction                 | 3.23 (0.98) | 0.20-4.00 | -<br>1.43(4.38)    | 3.41 (0.89) | -0.60-4.00 | -2.29<br>(9.28)    | 2.99 (1.39)             | -2.40-4.00 | -2.07<br>(7.44)    | 3.35 (0.93)            | -1.00-4.00 | -2.35<br>(9.79)    |
| MFQ-RA<br>Positive<br>Feelings         | 3.69 (0.58) | 0.60-4.00 | -1.68<br>(5.69)    | 3.56 (0.69) | 0.40-4.00  | -2.31<br>(9.39)    | 3.44 (0.81)             | 0.40-4.00  | -1.76<br>(6.01)    | 3.57 (0.62)            | 1.20-4.00  | -3.13<br>(15.1)    |



|                              |             |           |                  |             |            |                   |             |            |                  |             |           |                 |
|------------------------------|-------------|-----------|------------------|-------------|------------|-------------------|-------------|------------|------------------|-------------|-----------|-----------------|
| MFQ-RA Total                 | 3.45 (0.73) | 0.73-4.00 | -1.61<br>(5.70)  | 3.50 (0.70) | -0.13-4.00 | -2.44<br>(11.7)   | 3.21 (1.04) | -0.80-4.00 | -1.85<br>(6.38)  | 3.46 (0.73) | 0.73-4.00 | -1.78<br>(6.17) |
| MRS                          | 3.05 (0.58) | 1.30-4.20 | -0.58<br>(3.58)  | 3.11 (0.52) | 1.60-4.50  | -0.26<br>(3.42)   | 2.86 (0.63) | 1.10-3.90  | -0.82<br>(3.26)  | 3.07 (0.54) | 1.40-4.20 | -0.96<br>(4.29) |
| MTS                          | 3.84 (0.64) | 2.40-5.20 | -0.211<br>(2.54) | 3.67 (0.73) | 2.00-5.00  | -0.29 (-<br>0.21) | 3.78 (0.63) | 2.50-5.00  | 0.08<br>(2.34)   | 3.76 (0.59) | 2.60-4.90 | -0.02<br>(2.18) |
| OUS<br>Instrumental<br>Harm  | 4.64 (1.14) | 2.50-6.75 | -0.08<br>(2.15)  | 4.39 (1.13) | 1.25-6.50  | -0.30<br>(2.88)   | 4.23 (1.18) | 1.50-7.00  | 0.11<br>(2.89)   | 4.31 (1.13) | 1.00-6.50 | -0.09<br>(2.68) |
| OUS Impartial<br>Beneficence | 3.06 (1.14) | 0.80-5.80 | -0.10<br>(2.70)  | 3.28 (0.98) | 1.40-5.60  | 0.07<br>(2.58)    | 2.98 (0.98) | 1.20-5.40  | 0.05<br>(2.44)   | 3.19 (0.93) | 1.40-5.20 | 0.13<br>(2.35)  |
| OUS Total                    | 4.01 (0.94) | 1.67-6.56 | 0.09<br>(3.17)   | 3.91 (0.86) | 2.00-6.11  | 0.30<br>(3.04)    | 3.78 (0.93) | 1.78-6.44  | -0.001<br>(3.18) | 3.83 (0.88) | 1.67-6.00 | 0.17<br>(2.94)  |

---

## Output from G\*Power Sensitivity Analysis

Input data (sample size and number of predictors) is from Tables S8-S9 and S11-S12, all of which had seven predictors.

*Thursday, September 05, 2024 -- 02:10:11*

**F tests** - Linear multiple regression: Fixed model,  $R^2$  deviation from zero

|                  |                                           |   |            |
|------------------|-------------------------------------------|---|------------|
| <b>Analysis:</b> | Sensitivity: Compute required effect size |   |            |
| <b>Input:</b>    | $\alpha$ err prob                         | = | 0.05       |
|                  | Power ( $1-\beta$ err prob)               | = | 0.8        |
|                  | Total sample size                         | = | 130        |
|                  | Number of predictors                      | = | 7          |
| <b>Output:</b>   | Noncentrality parameter $\lambda$         | = | 15.1918934 |
|                  | Critical F                                | = | 2.0854845  |
|                  | Numerator df                              | = | 7          |
|                  | Denominator df                            | = | 122        |
|                  | Effect size $f^2$                         | = | 0.1168607  |

This output suggests that with a sample size of 130, 7 predictors, an alpha level of 0.05, and a power of 0.80, the model is sensitive enough to detect an effect size of 0.117 (small-medium range), or a beta value of .122 or larger.
